# Supplementary material for: High-resolution global peptide-protein docking using fragments-based PIPER-FlexPepDock
Source: PubMed Central journal article supplement (PMC5760072; doi:10.1371/journal.pcbi.1005905), 2017-12-27
Supplement: pcbi.1005905.s005.pdf [file pcbi.1005905.s005.pdf]

**S2 Table. Median fragment-native Backbone-RMSD values for the PeptiDock set complexes** obtained using Rosetta fragment picker and the motif-based fragment generation approach (used in PeptiDock (24)).

| Complex | PDB ID        |  | Peptide sequence<br>(defined by PeptiDock) | Fragment quality <sup>a</sup> |                                                  |
|---------|---------------|--|--------------------------------------------|-------------------------------|--------------------------------------------------|
|         | Free Receptor |  |                                            | Rosetta fragment picker       | PeptiDock sequence – motif based fragment picker |
| 1D4T:A  | 1D1ZA         |  | TIYAQV                                     | 2.4                           | <b>1.9<sup>b</sup></b>                           |
| 1SSH:A  | 1OOTA         |  | PAMPAR                                     | 2.0                           | 2.1                                              |
| 1MFG:A  | 2H3LA         |  | LDVPV                                      | 1.4                           | 1.4                                              |
| 2H9M:A  | 2H14A         |  | ARTKQ                                      | <b>2.1</b>                    | 2.4                                              |
| 2FOJ:A  | 2FAWA         |  | RAHSS                                      | <b>1.6</b>                    | 2.0                                              |
| 2HPL:A  | 2HPJA         |  | DDLYG                                      | <b>1.7</b>                    | 2.2                                              |
| 1CZY:A  | 1CA4A         |  | PQQATDD                                    | 2.4                           | 2.5                                              |
| 1JD5:A  | 1JDA          |  | AIAYF                                      | 1.4                           | 1.5                                              |
| 2VJ0:A  | 1B9KA_1       |  | WVTFE                                      | <b>1.1</b>                    | 2.1                                              |
| 2VJ0:A  | 1B9KA_2       |  | FEDNF                                      | <b>2.0</b>                    | 2.5                                              |
| 2C3I:B  | 2J2IB         |  | RRRHPS                                     | 2.5                           | 2.4                                              |
| 2CCH:B  | 1H1RB         |  | KGRRL                                      | <b>1.5</b>                    | 1.9                                              |
| 1EG4:A  | 1EG3A         |  | RSPPPY                                     | 1.6                           | 1.8                                              |
| 1RXZ:A  | 1RWZA         |  | QATLERWF                                   | 2.9                           | 2.8                                              |
| 1ER8:E  | 4PAEA         |  | HLLVY                                      | 1.8                           | 2.0                                              |
| 1JWG:A  | 1JWFA         |  | DEDLL                                      | 2.1                           | <b>1.6</b>                                       |

<sup>a</sup> Similarity between fragments and bound peptide conformation: Median backbone RMSD (Å)

<sup>b</sup> In bold: significantly better fragments ( $\Delta \geq 0.3$  Å)
